# Supplementary material for: Heterogeneous Thermochromic Hydrogel Film Based on Photonic Nanochains
Source: MDPI journal article supplement (doi:10.3390/nano12111867), 2022-05-30
Supplement: s1 [file s1]

# Heterogeneous Thermochromic Hydrogel Film Based on Photonic Nanochains

Hexuan Yan <sup>1</sup>, Luying Si <sup>2</sup>, Gang Li <sup>1</sup>, Lejian Zhao <sup>2</sup>, Wei Luo <sup>1,\*</sup>, Huiru Ma <sup>3,\*</sup> and Jianguo Guan <sup>2</sup>

<sup>1</sup> State Key Laboratory of Advanced Technology for Materials Synthesis and Processing, School of Materials Science and Engineering, Wuhan University of Technology, Wuhan 430070, China; yanhx@whut.edu.cn (H.Y.); chemligang2010@whut.edu.cn (G.L.)

<sup>2</sup> State Key Laboratory of Advanced Technology for Materials Synthesis and Processing, International School of Materials Science and Engineering, Wuhan University of Technology, Wuhan 430070, China; siluying@whut.edu.cn (L.S.); 298552@whut.edu.cn (L.Z.); guanjq@whut.edu.cn (J.G.)

<sup>3</sup> School of Chemistry, Chemical Engineering and Life Science, Wuhan University of Technology, Wuhan 430070, China

\* Correspondence: rowell@whut.edu.cn (W.L.); mahr@whut.edu.cn (H.M.)

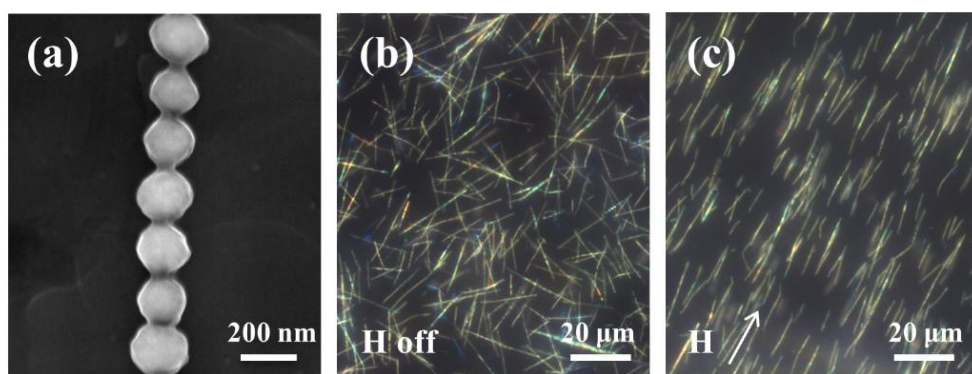

Figure S1. (a) SEM of a single  $\text{Fe}_3\text{O}_4@\text{PVP}@\text{P}(\text{AA-co-HEMA})$  PNC. Dark-field optical microscope images of the same batch of PNCs dispersed in mixed solution of ethanol and water under (b) zero, (c) a horizontal magnetic field.

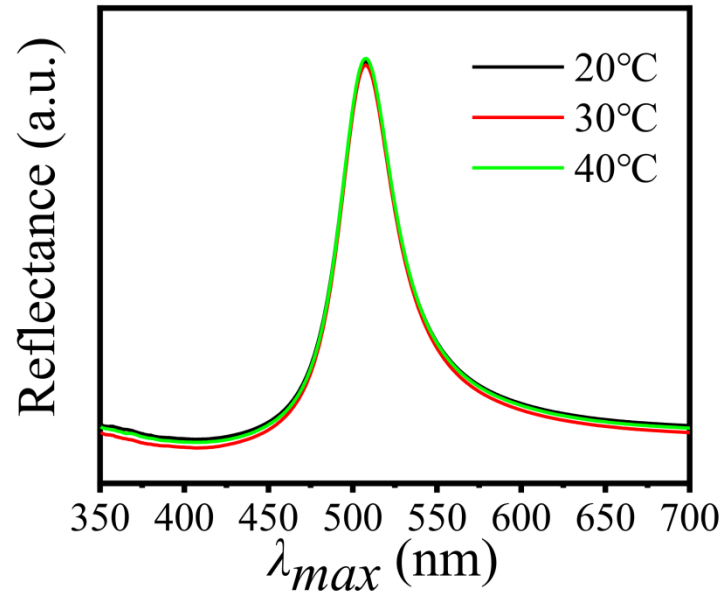

Figure S2. Reflection spectrum of PNCs at different temperature

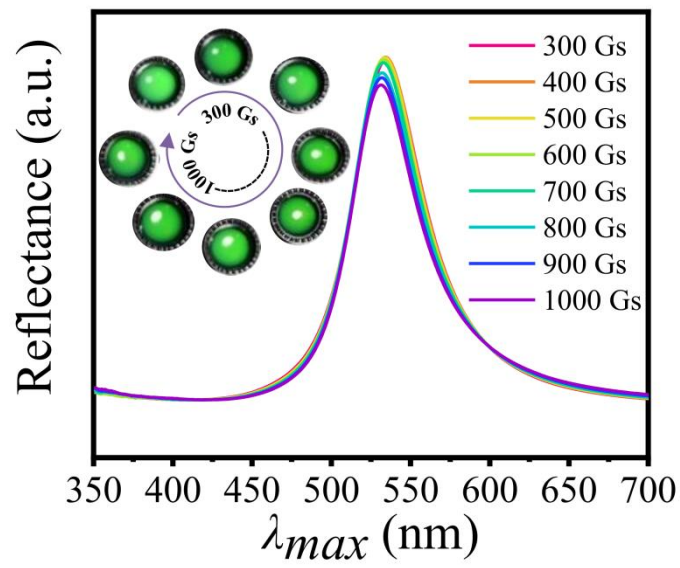

Figure S3. Reflection spectrum of PNCs under different magnetic fields

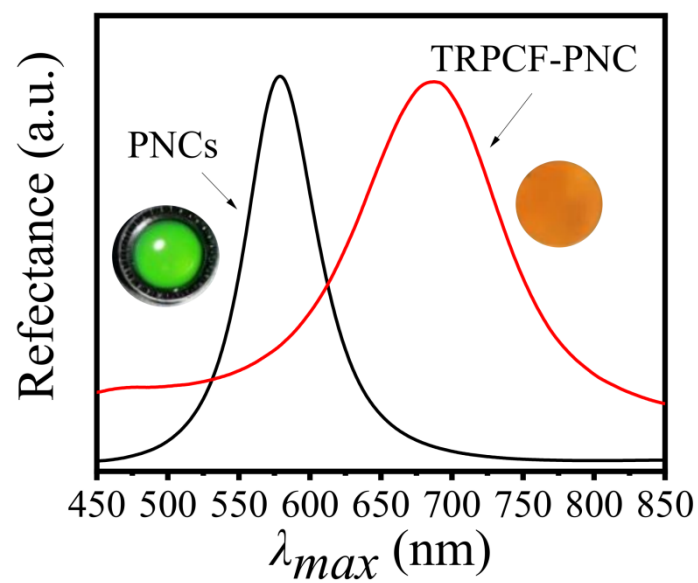

Figure S4. Reflection spectrum of PNCs and swelling-equilibrated TRPCF-PNC

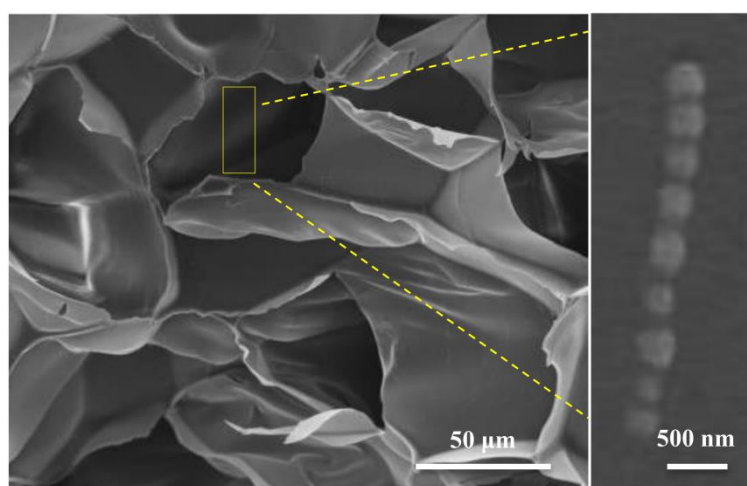

Figure S5. SEM images of TRPCF-PNC and magnification of one PNC.

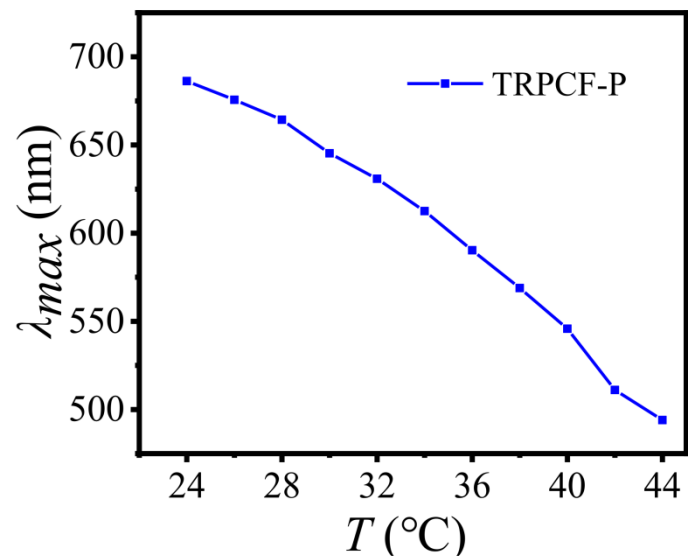

Figure S6. Reflection wavelength at the maximum reflection intensity of TRPCF-P as a function of temperature

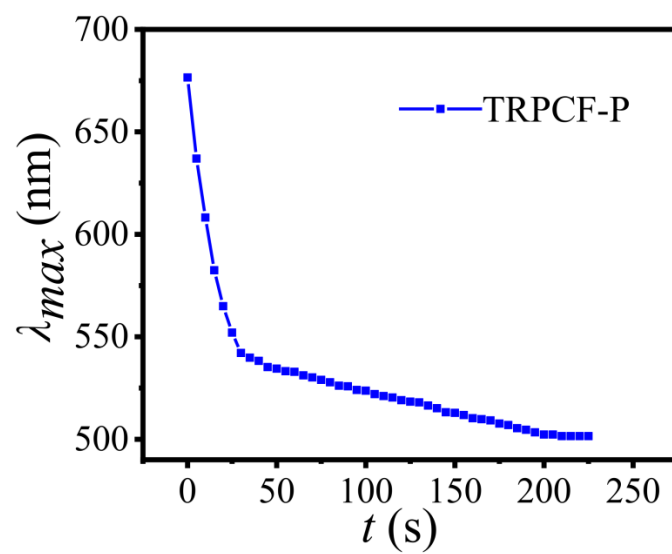

Figure S7. Reflection wavelength as a function of  $t$  when transferring TRPCF-P from 26 °C water bath to 44 °C water bath

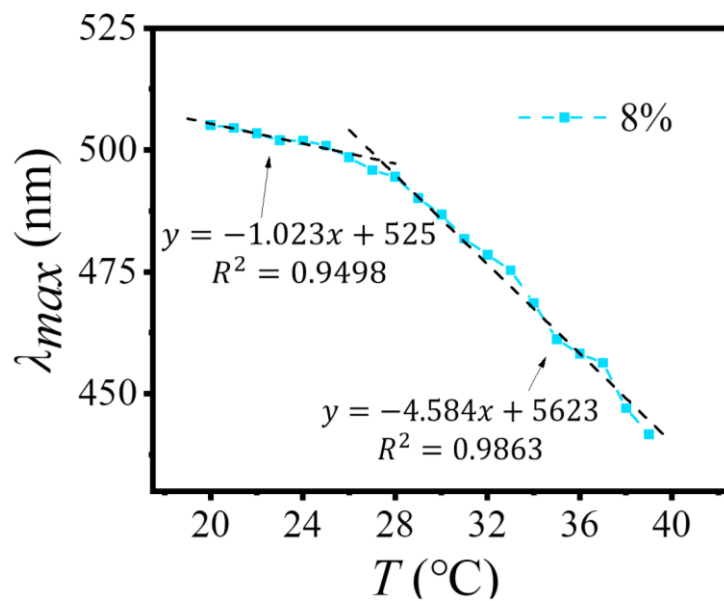

Figure S8. Reflection peak position curves of TRPCF prepared with  $\text{Fe}_3\text{O}_4\text{@PVP@PHEMA}$  PNC as a function of temperature
